# Supplementary material for: Acacia Polyphenol Ameliorates Atopic Dermatitis in Trimellitic Anhydride-Induced Model Mice via Changes in the Gut Microbiota
Source: MDPI journal article supplement (doi:10.3390/foods9060773), 2020-06-11
Supplement: s1 [file s1]

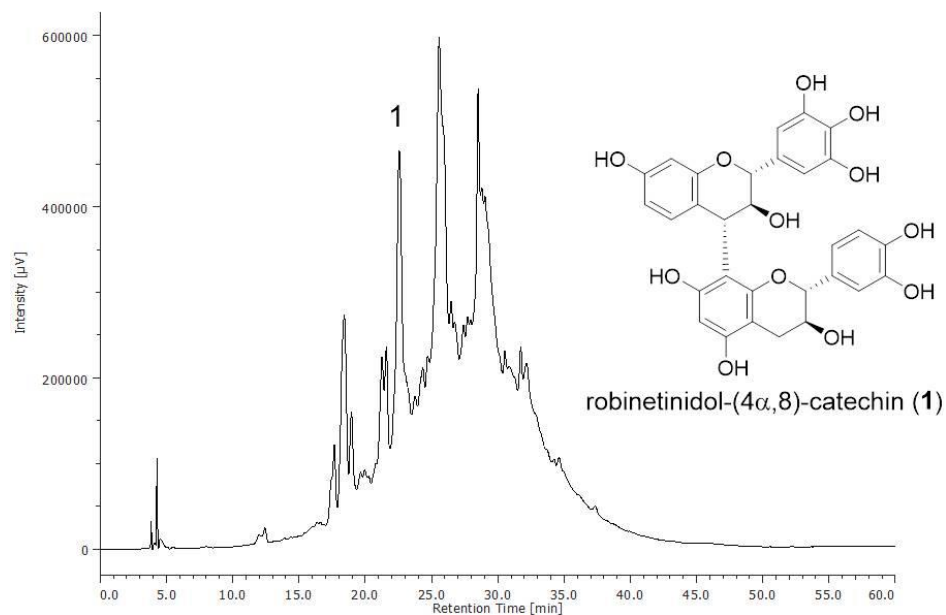

**Figure S1.** HPLC profile of the extract of *Acacia mearnsii* bark. Dried extract of *Acacia mearnsii* was solubilized with 60% EtOH (5.0 mg/mL). After filtration (membrane filter, 0.45  $\mu$ m), 10  $\mu$ L of filtrate was analyzed by analytical HPLC. Analytical HPLC was performed on a Cosmosil 5C<sub>18</sub>-ARII (Nacalai Tesque) column (250  $\times$  4.6 mm, i.d.) with a gradient elution of 4–30% (39 min) and 30–75% (15 min) CH<sub>3</sub>CN in 50 mM H<sub>3</sub>PO<sub>4</sub> at 35  $^{\circ}$ C (flow rate, 0.8 mL/min; detection, 230 nm; detector: Jasco photodiode array detector MD-4010, Jasco, Tokyo, Japan).
